# Supplementary material for: Characteristics of ionospheric irregularities near the northern equatorial anomaly crest
Source: Copernicus journal article supplement (doi:10.5194/angeo-2019-64), 2019-04-26
Supplement: Supplementary file [file angeo-2019-64-AC4-supplement.pdf]

# 1 **Characteristics of ionospheric irregularities**

## 2 **near the north EIA at 121 °E**

3       Jinghua Li<sup>1</sup>, Guanyi Ma<sup>1,2</sup>, Klemens Hocke<sup>3,4</sup>, Qingtao Wan<sup>1</sup>, Jiangtao Fan<sup>1</sup>, Xiaolan Wang<sup>1</sup>

4       <sup>1</sup> National Astronomical Observatories, Chinese Academy of Sciences, Beijing, China.

5       <sup>2</sup> University of Chinese Academy of Sciences, Beijing, China.

6       <sup>3</sup> Institute of Applied Physics, University of Bern, Bern, Switzerland

7       <sup>4</sup> Oeschger Centre for Climate Change Research, University of Bern, Bern, Switzerland

8       Corresponding to: G. Ma (guanyima@nao.cas.cn)

9       **Abstract.** Observation from two IGS stations TWTF (24.95 °N, 121.16 °E, dip latitude: 18.20 °N)  
10       and SHAO (31.10 °N, 121.20 °E, dip latitude: 23.30 °N) are used to study the characteristics of the  
11       irregularities. Five latitude belts, 20~23 °N, 23~26 °N, 26~29 °N, 29~32 °N and 32~35 °N are  
12       divided according to the latitudes of the ionospheric piercing points. The seasonal variation and  
13       the latitude dependence of the occurrence are studied for three different solar activity years of  
14       2003 (medium year), 2008 (minimum year) and 2014 (maximum year). Local occurrence rate  
15       (LOR) is proposed and defined as the ratio of the number of ROTI larger than the threshold to  
16       the number of observed ROTI in the nighttime. It can indicate the spatiotemporal range of the  
17       irregularity. LOR in one month is calculated to research the irregularities together with the  
18       monthly occurrence rate (MOR), which is defined as the ratio of the irregularities traverse events  
19       to the observation days in one month. MOR in May/June is larger than those in equinoxes except  
20       in 20~23°N for the March of 2014, which is different from the equinoctial occurrence maximum  
21       of equatorial plasma bubbles (EPB). In 20~23 °N and 23~26 °N, LOR maximum are observed in  
22       March and September, and no peak appeared in June. But in the higher three latitude belts, LOR  
23       maximum appeared in June. LOR and MOR peaks in March and September means the  
24       irregularities appeared frequently with large spatiotemporal range. Large MOR and small LOR in  
25       June in 20~23 °N and 23~26 °N implies the irregularities often occurred with small  
26       spatiotemporal range. In 26~29 °N, 29~32 °N and 32~35 °N, the maximum of MOR and LOR  
27       were in June, implying the irregularities appeared more frequently and had larger spatiotemporal  
28       range than those in other months. Moreover, MORs and LORs decrease with the latitudes in  
29       March and September of 2003 and 2014. This implies the EPB played an important role on the  
30       irregularities in these months. In June, MORs and LORs in the higher three latitudes belts are

31 larger than the lower two ones, it can be suggested that the irregularities in this month were  
32 mainly from the nonequatorial process, which is more frequently happened but weaker than  
33 plasma bubble in spatiotemporal scale. MOR, LOR and the ROTI maximum in each month are  
34 small in 2008. The seasonal variation of ROTI maximum proved that the irregularities in  
35 29~32 N and 32~35 N has small TEC fluctuation in the three years. But they peaks in spring and  
36 autumn of 2003 and 2014 in 20~23 N, 23~26 N and 26~29 N. This confirmed the results from  
37 MOR and LOR.

## 38 **1 Introduction**

39 The ionospheric irregularities are spatially irregular variation of electron density or  
40 fluctuation of total electron content (TEC) with scale lengths from a few meters to several tens of  
41 kilometers. When radio waves propagate through the irregularities, variations in signal strength  
42 happen due to refractive effect. This phenomenon is referred to as ionospheric scintillation, which  
43 degrades both the performance of satellite communication and the precision of satellite navigation  
44 (Basu & Basu, 1981; Maruyama, 2002). Severe scintillation can lead satellite service interruption  
45 due to loss of lock in receivers. Moreover, TEC fluctuations in ionospheric irregularities are a  
46 major error to radio interferometers, differential Global Positioning System (DGPS) and synthetic  
47 aperture radar (SAR) (Erickson et al., 2001; Zaboltn and Wright, 2004; Afraimovich and  
48 Yasukevich, 2008; Lee et al., 2011, Zheng et al., 2008).

49 Most intense ionospheric irregularities are those occurred in low-latitude regions near the  
50 magnetic equator. They were first recorded as the spreading of the traces of F layer echoes on  
51 ionograms with ionosonde. It has been since called equatorial spread F as well (Booker and Wells,  
52 1938). Using the data from incoherent scattering radar, a plumelike irregular structure was found  
53 in a range-time-intensity diagram which provides the dynamic process of the irregularity evolution.  
54 It was then proposed that the irregularities are produced as low-density 'plasma bubbles' at the  
55 bottomside of the ionosphere and bubbles can easily reach even much more than 1000 km  
56 (Woodman and La Hoz, 1976). The equatorial plasma bubbles (EPB) were directly confirmed by  
57 AE-C satellite in-situ measurements as regions of abrupt drop-out of electron density by two  
58 orders of magnitude with sizes of several tens of kilometers (McClure et al., 1977). Furthermore

59 the optical imaging techniques probed two-dimensional structure of the plasma bubble (Weber et  
60 al., 1978; Mendilo and Baumgardner, 1982; Balan et al., 2018). It has been generally understood  
61 that plasma bubbles are generated at the bottom of the equatorial ionosphere by the generalized  
62 nonlinear Rayleigh-Taylor instability. While moving upward from the lower ionosphere into the  
63 higher density ionosphere, they extend along the magnetic flux tube to higher latitudes and often  
64 reach to the equatorial ionization anomaly (EIA) crest (Kelley and McClure, 1981; Ossakow,  
65 1981).

66 The ionospheric irregularities have been studied with radar, satellite, airglow imager  
67 observations and simulations (Balan et al., 2018). Different observational techniques have their  
68 own advantage to reveal different aspects of the characteristics of the ionospheric irregularity.  
69 Since the civilian use of Global Navigation Satellite System (GNSS) the observation with  
70 ground-based dual-frequency GNSS receivers has become an important mean for ionospheric  
71 studies. While the fluctuation of phase and amplitude of GNSS signal, and hence scintillation,  
72 occur due to ionospheric irregularity, TEC also fluctuates. The rate of change of the TEC, termed  
73 ROT, and further, a rate of TEC index (ROTI) have been proposed as an indicator of the presence  
74 of ionospheric irregularity and a parameter of TEC fluctuation (Aaron et al., 1996; Pi et al. 1997;  
75 Basu et al., 1999). ROTI was used to investigate extensively the ionospheric equatorial bubbles or  
76 irregularities at different time and over different regions for the last 20 years. Statistical and case  
77 studies were successful in describing the occurrence features of the irregularity with local time,  
78 seasonal variations, solar cycle and its geographical dependence (Otsuka et al., 2006, Nishoka et  
79 al., 2008; Sripathi et al., 2018). Mungufeni et al. (2016) studied the ionospheric irregularities over  
80 African low latitude region during quiet and disturbed geomagnetic conditions, and found the  
81 equinox asymmetries of the irregularities' strength. Nevertheless, the characteristics of the  
82 irregularities near EIA have not been fully understood. This area is located between the equator  
83 and the mid latitude, and the irregularities may be affected by different process.

84 This paper aims to study statistical characteristics of irregularities near the north EIA with  
85 continuous GPS observations for the solar minimum of 2008, medium of 2003 in the declining  
86 phase of cycle 23, and the solar maximum of 2014 in solar cycle 24. Section 2 describes  
87 observation and data analysis method. Section 3 gives the results. Section 4 deals with the  
88 discussion. Finally, conclusions are drawn in section 5.

89 **2 Observation and data analysis**

90 **2.1 Observation**

91 The observations are from two International GNSS Service (IGS) stations TWTF (24.95 °N,  
92 121.16 °E, dip latitude: 18.20 °N) and SHAO (31.10 °N, 121.20 °E, dip latitude: 23.30 °N). The dual  
93 frequency GPS receivers at the two stations sample the measurements with 30-s intervals. TWTF  
94 is near the north EIA crest. SHAO station is ~6 degree higher in latitude than TWTF along the  
95 longitude. The data from SHAO is used to understand the characteristics of the low-latitude  
96 irregularities better at TWTF. The data are from the solar medium of 2003, minimum of 2008 in  
97 the declining phase of cycle 23, and the solar maximum of 2014 in solar cycle 24. For SHAO  
98 station, no measurement is recorded from the 193rd day except the 329nd day.

99 Figure 1 depicts a map of the ionospheric piercing point (IPP) of GPS satellites at 400 km  
100 observed from TWTF and SHAO, with an elevation cutoff of 30 degrees, during 18:00~06:00  
101 local time on 20th March 2003. The starting positions of the traces are marked with dots. The  
102 coverage of these traces is mainly within 20-35 °N in latitude and 116-126 °E in longitude. The  
103 stars represent the location of the two receivers. The dash lines represent the magnetic latitude  
104 marked by the number on the right. Due to the periodic orbits of the satellites, the coverage of the  
105 IPP traces is almost the same every day. According to the latitude of IPPs, the area are divided into  
106 5 latitude belts, 20-23 °N, 23-26 °N, 26-29 °N, 29~32 °N, 32~35 °N to study the dependence of the  
107 irregularities near the EIA crest.

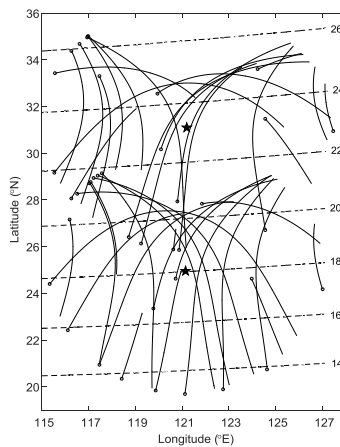

108

109

Figure 1 The IPP trace at the two stations

## 110 2.2 ROTI calculation

111 Dual-frequency GPS receiver recorded the phase measurements ( $L_1$ ,  $L_2$ ) on two frequency of  
112 1.574GHz (referred as  $f_1$ ) and 1.228GHz (referred as  $f_2$ ) in the observation files at 30 sec interval.  
113 Based on the phase measurements, the relative slant TEC along the line of sight (LOS) between  
114 the satellite and receiver can be calculated. By taking the difference between the slant TECs at two  
115 successive times, a rate of change of the TEC was defined as  $ROTI_i = (N_{Ti} - N_{T_{i-1}})/(t_i - t_{i-1})$   
116 where  $N_{Ti}$  is the slant TEC for the  $i^{th}$  measurement at time  $t_i$  (Aarons et al., 1996). Further,  
117 ROTI, the standard deviation of ROT, is calculated to quantify the TEC fluctuation by  
118  $ROTI = \sqrt{\langle ROT_i^2 \rangle - \langle ROT_i \rangle^2}$  in 5 minutes (Pi et al., 1997). The cycle slip of the phase  
119 measurements and loss of lock are detected when ROTI is calculated.

## 120 2.3 Detection of irregularity traverse event

121 The ionospheric irregularity is surveyed by a criterion as follows. The GPS observation with  
122 satellite elevation larger than 30 degrees is used in order to mitigate the effect of the multipath. A  
123 threshold is needed to detect the existence of the irregularity by ROTI. The threshold is calculated  
124 from the daytime (6:00LT~18:00LT) observations, considering that the irregularities often appear  
125 in the nighttime. It is defined as:

$$126 \quad \text{thrshld} = \text{median} + 10 \times \text{rms} \quad (6)$$

127 Median and root mean square (RMS) of ROTI are from all of the ROTIs in one daytime. So  
128 the threshold is a little different day by day, and it varies in the range of 0.11-0.20 TECU/min for  
129 all the days in 2003, 2008 and 2014. If more than 20 consecutive ROTIs are larger than the  
130 threshold, the IPP is reckoned to traverse the ionospheric irregularities, and an irregularity traverse  
131 event is identified and the beginning time is marked by the first epoch with ROTI larger than the  
132 threshold. If more than 40 consecutive ROTIs in 20 minutes are smaller than the threshold, the  
133 ending time is marked as the first epoch when ROTI is smaller than the threshold. Another  
134 irregularity traverse event will be counted if it is encountered more than 1 hour later than the  
135 ending time of the previous event.

136 **2.4 Occurrence rates definitions**

137 Two kinds of occurrence rates are defined and studied. Monthly occurrence rate (MOR) is  
138 used to describe the frequency of the irregularity events in one month and defined as:

139 
$$MOR = \frac{\text{the days with irregularity in one month}}{\text{all the observation day in the month}} \quad (7)$$

140 Higher monthly occurrence rate implies the irregularity happens frequently in daily scale.

141 Local occurrence rate (LOR) is proposed to indicate the spatiotemporal range of the  
142 irregularities and are calculated by:

143 
$$LOR = \frac{\text{the number of ROTIs larger than the threshold in events}}{\text{all the ROTIs number during the nighttime}} \quad (8)$$

144 The duration of the irregularities and the numbers of IPP encountering the irregularities will  
145 affect the value of LOR, but they did not change MOR. The ionospheric irregularities with large  
146 spatiotemporal scales can result in large LOR. To compare with MOR, LOR is calculated in one  
147 month.

148 **3 Results**

149 **3.1 Start time of irregularity traverse**

150 The irregularities traverse events were detected by ROTI in the three years at TWTF and  
151 SHAO. The distribution of the beginning time for the irregularity events is shown in Fig. 2. The  
152 left panel is based on the observations at TWTF, and the right one is for SHAO station. At TWTF,  
153 most of the irregularity traverse events were first observed after sunset and before midnight. The  
154 occurrence time is not similar in the three years. In 2003, the occurrence number was large at  
155 20:00~22:00 LT with the maximum at 20:00~21:00 LT. In 2008, the occurrence number increased  
156 with the local time before midnight and then it decreased, the maximum was at 23:00~00:00 LT.  
157 In 2014, the irregularities mainly appeared at 19:00~00:00 LT, and the maximum was at  
158 19:00~20:00 LT. After midnight the occurrence number soon decreased.

159 At SHAO station, the irregularity events also mainly appeared before midnight, but no  
160 occurrence peaks appeared after sunset. The occurrence time varies in a similar way in the three

161 years. The occurrence number gradually increased and peaked at 21:00~23:00 LT, and then it  
 162 decreased. Compared the occurrence time at TWTF, the occurrence time at SHAO was later. The  
 163 latitude of SHAO station is ~6 degree higher than the TWTF station. If the irregularities observed  
 164 at TWTF and SHAO were from the equatorial plasma bubbles, they must be observed earlier at  
 165 TWTF. If the irregularities are from the non-equatorial process, it depends on the source location  
 166 of the irregularities. Based on the two stations observations, it is difficult to tell where the source  
 167 of the irregularities is, and it is not the focus of this paper.

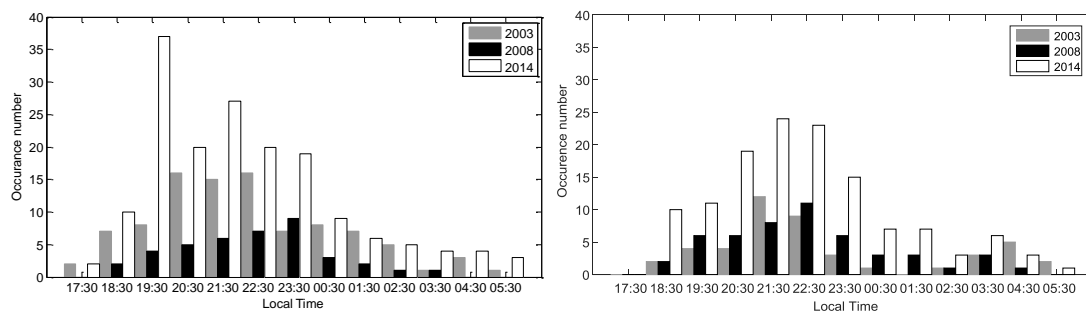

168  
 169 Fig. 2. Distribution of the first observed times for irregularity traverses at TWTF and SHAO.

### 170 3.2 Variation of MOR

171 In this section the seasonal variation and latitude dependence of MOR is studied for the three  
 172 different solar activity years. MOR and LOR in August to December of 2003 are only based on the  
 173 TWTF station because of the data outage at SHAO station.

174 Figure 3 presents the variation of MORs in 2014, 2003 and 2008 respectively. This figure  
 175 shows that MORs in 2014 were generally larger than those in 2008 and 2003. In the solar  
 176 maximum activity year of 2014, MORs for 20~23°N peaked in March, June, September and  
 177 November with the value of 67%, 57%, 37% and 15% respectively. For this latitude belt, MORs in  
 178 March and June were larger than that in September and November. But in 23~26°N MORs did not  
 179 peak in winter, and the value of 61% in March was a little smaller than 64% in June. In 26~29°N,  
 180 29~32°N and 32~35°N, MORs only peaked in March and June. And in these latitudes, MORs in  
 181 June were 71%~82%, much larger than the values of 7%~32% in March.

182 In the medium solar activity year of 2003, the seasonal variation of MOR was very different  
 183 from that in 2014. In 20~23°N, MOR peaked in February, May and October with the value of 18%,  
 184 41% and 15% respectively. At 23~26°N, MORs peaked in February, June and October with the

185 value of 21%, 46% and 15% respectively. MORs in the higher three latitude belts peaked only in  
 186 June with the value of 39%, 46% and 51%, which were much larger than the values in other  
 187 months. This means the irregularities appeared more frequently in June in the medium solar  
 188 activity year of 2003.

189 In the minimum solar activity year of 2008, the peaks appeared in May and June, which was  
 190 similar to that in 2003. But in this year, MOR did not peak in autumn for all the latitude belts. In  
 191 the lower three latitude belts, MORs had peaks of ~25% in May. In 29~32 N and 32~35 N, MORs  
 192 peaked in June with the value of ~35%. Compared with those in 2003 and 2014, MORs were  
 193 much smaller in 2008.

194 Besides the seasonal variations, MORs also depended on the latitudes, as shown in Figure 3.  
 195 MORs decreased with the latitudes in March and September of 2014. Similar latitude dependence  
 196 appeared in February and March of 2003. This means the irregularities appeared more frequently  
 197 at the lower latitudes in these months. In June of the three years, MORs increased with the  
 198 latitudes except that at 32~35 N. This implies that the irregularities in June occurred more  
 199 frequently in the higher latitudes.

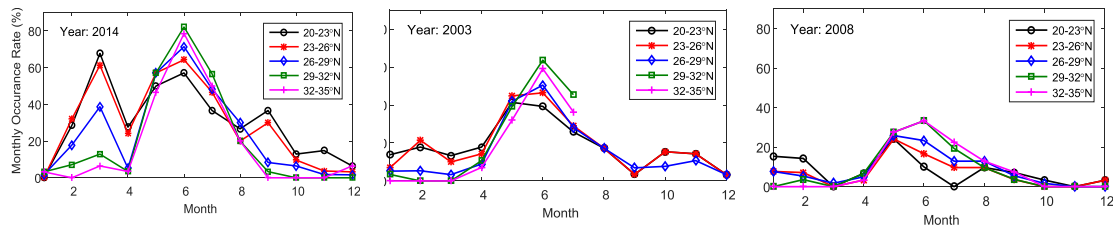

200  
 201 Figure 3 MOR of irregularities in 2008, 2003 and 2014 for different latitude belts

202 **3.2 Variation of LOR**

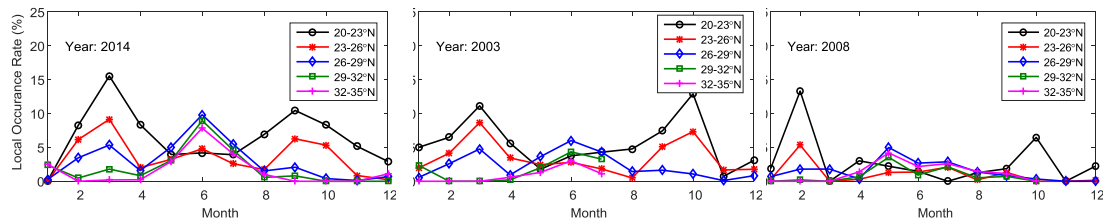

203  
 204 Figure 4 LOR of irregularities in 2003, 2008 and 2014 for different latitude belts

205 As mentioned in section 2, we defined LOR to describe the spatiotemporal variation of the  
 206 ionospheric irregularities. Figure 4 shows LOR in each month for the three different solar activity



207 years. In 2014, LORs for 20~23 °N peaked in March and September with the value of 16% and 11%  
208 respectively. Different from MOR, LOR did not peak in June in this year. This means the  
209 irregularities in this latitude belts had small spatiotemporal range although they appeared  
210 frequently. In 23~26 °N, LORs began to appear small peak of 4% in June, at the same time, the  
211 peaks in March and September were 9% and 6%. At the higher three latitude belts, the peaks of  
212 8%~10% in June were larger than the values of 0~5% in March, and no peaks appeared in autumn.  
213 This implies the irregularities at 26~35 °N had larger spatiotemporal range in June than those in  
214 March.

215 In 2003, LORs had similar seasonal variation to those in 2014 besides that the autumn peaks  
216 were in October in 20~23 °N and 23~26 °N. In the solar minimum year of 2008, the two peaks of  
217 14% and 7% were in February and October at 20~23 °N. At 23~26 °N, LOR peaks in February and  
218 July of 2008. LORs of 4%~5% in May were larger than those in other months for the latitude belts  
219 of 26~29 °N, 29~32 °N and 32~35 °N.

220 Compared Figure 4 with Figure 3, it can be noted that the MORs and LORs were different at  
221 different latitude belts. In March and September of 2014, March and October of 2003, and  
222 February of 2008, both MORs and LORs decreased with the increasing of the latitudes. This  
223 implies the irregularities were mainly from the equatorial plasma bubbles, and the equatorial  
224 plasma bubbles may play an important role in these months. In June of 2014, MORs increased  
225 with the latitudes except that at 32~35 °N, and LORs at the three higher latitude belts were close to  
226 each other, and they were larger than those at 20~26 °N. It suggested that the irregularities in June  
227 were not mainly from the equatorial process, the non-equatorial process played an important role  
228 on the summer irregularities. The latitude dependence of LOR in June of 2003 was not same to  
229 that in 2014, but they were similar to each other and different with the characteristics of the  
230 equatorial plasma bubbles.

### 231 **3.3 Variation of ROTI Maximum**

232 As mentioned above, ROTI is an index to dedicate the fluctuation of TEC. Therefore, large  
233 ROTI means large electron density fluctuation. Figure 5 displays the variation of the monthly  
234 ROTI maximum for different latitude belts in the three different solar activity years. ROTI

235 maximum tends to be larger for higher solar activity.

236 In solar maximum year of 2014, ROTI maximum in 26-29°N and 26-29°N were less than 2.0  
237 TECU/min in the whole year. ROTI maximum had peaks of 7.8-8.9 TECU/min in Feb/Mar and  
238 2.2-4.90 TECU/min in Sep for the latitude belts of 20-23°N, 23-26°N and 26-29°N. The largest  
239 ROTI maximum happened in the latitude belt of 23-26°N in March and September. In February,  
240 ROTI largest maximum appeared at 26-29°N. In June and the peak value of 2.2 TECU/min for  
241 latitude belt 26-29°N was comparatively large, and values of ~1.0TECU/min in other latitude belts  
242 were close to each other. The ROTI maximum at latitude belt 20-23°N had a moderate peak of 4.5  
243 TECU/min in November. There were also peaks in September, although the values of ROTI  
244 maximum were around 3.84 TECU/min, which is smaller than that in May. ROTI maximum in  
245 26-29°N latitude belt was generally smaller than those in 20~23°N and 23~26°N latitude belts for  
246 the whole year except in June.

247 In solar medium year of 2003, ROTI maximum in the lower three latitude belts generally  
248 peaked at Feb/Mar and October with values of ~3.9-7.6 TECU/min and ~1.8-3.4 TECU/min,  
249 respectively. ROTI maximum for latitude belt 20-23°N also has peaks in May, August and October.  
250 The ROTI maximum increased with latitude in March, it can also decrease with latitude in  
251 April-August and October for the lower three latitudes. And in the higher two latitude belts, ROTI  
252 maximum peaks in summer and the values are ~1.0TECU/min.

253 In solar minimum year of 2008, the ROTI maximum was very low and peaked in February  
254 and October with values of 1.7 and 1.2 TECU/min for latitude belts 20~23°N. In 23~26°N, the  
255 peak 1.5 TECU/min only appeared in February. In 26~29°N the maximum peaks in June with the  
256 value of 1.6 TECU/min. It was around or below 0.50 TECU/min for other months. The differences  
257 of ROTI maximums among different latitude belts were generally small.

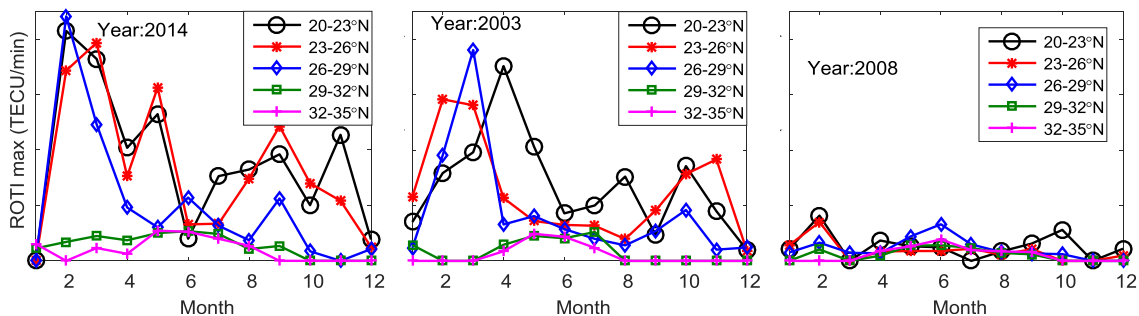

Figure 5 variation of ROTI maximum

### 260 3.4 ROTI maximum with solar activity

261 A scatter plot was presented to tell the relation of ROTI maximums for each the irregularity  
262 traverse event with solar activity, as shown in Fig. 6. Here used is the radio flux at 10.7 cm (F10.7)  
263 as an indicator of the solar activity. The symbols of cross, circle and dot represent the year of 2003,  
264 2008 and 2014, respectively. The colors in red, magenta, green and blue distinguish spring,  
265 summer, autumn and winter.

266 In solar minimum of 2008, F10.7 was smaller than 80 sfu. At TWTF ROTI was generally  
267 around 0.50 TECU/min in this year, and the largest ROTI was 1.64 TECU/min in winter. At  
268 SHAO, most ROTI was around 0.3 TECU/min, and the maximum was in summer. In solar  
269 medium and maximum years of 2003 and 2014, F10.7 was between 84-172 sfu and 86-208 sfu,  
270 respectively. At TWTF, the ROTI maximum had a tendency to increase with F10.7. However,  
271 ROTI can be small (less than 1 TECU/min) no matter how large F10.7 is. At SHAO, ROTI did not  
272 have relation to F10.7 in all the seasons of the three years, and ROTI values were much smaller  
273 than those at TWTF.

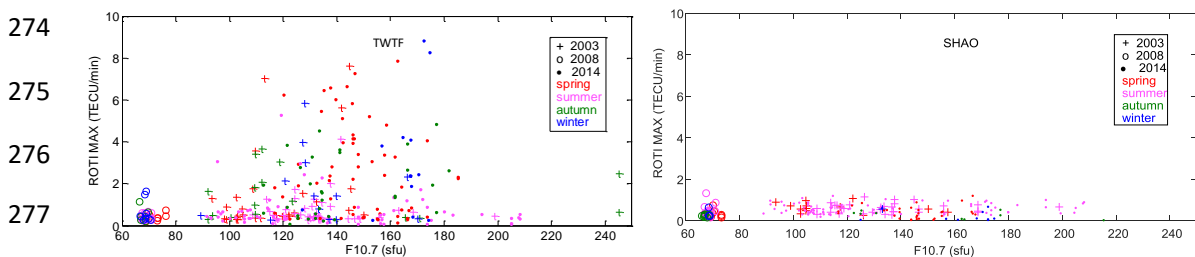

278 Fig. 6. Scatter plot of ROTI maximum for irregularity event versus F10.7 for different solar activity years.

### 279 4 Discussions

280 Low latitude irregularities are generally thought to be related with plasma bubbles generated  
281 at the magnetic equator. The occurrence of EPB in Asian region is known to be maximum in  
282 equinoxes (Tsunoda, 1985). Nishioka et al. (2008) revealed higher MOR of EPBs around spring  
283 equinox (summer solstice) than autumn equinox (winter solstice) from 2000 to 2006 with  
284 ground-based GPS networks around the dip equator. In Fig. 3, the MORs in solar maximum year  
285 of 2014 generally showed maximum values in March, June, September, and November,  
286 respectively. The maximum value in March (June) was much larger than that in September  
287 (November) for latitudes 20-26 N. This is in agreement with the results from GPS observations

288 both at equatorial region and crest in solar maximum and high activity years (Nishioka et al., 2008;  
289 Kumar, 2017; Lee et al., 2009). But the MOR peaks in November only appeared in 20~23 °N. In  
290 the higher latitude belts, no MOR peaked in winter. This implies the irregularities near the dip  
291 equator in winter solstice cannot reach the latitudes higher than 23 °N.

292 In a morphology study of EPBs during low and high solar activity years in latitudes 13-17 °N  
293 over Indian sector, Kumar (2017) found maximum EPB occurrences during the equinoctial  
294 months throughout 2007–2012 except during the solar minimum years in 2007–2009. During  
295 2007–2009, the maximum EPB occurrences were observed in June solstice. However, Figure 3  
296 shows that the MOR in June are generally higher than that in equinoxes except at 20~23 °N in  
297 2014. In 2003, MOR of the irregularities in June is also higher than those in March and September.  
298 This is different from the occurrence of the EPBs in the high and medium solar activity years  
299 (Kumar, 2017). The difference should mainly owe to the higher latitudes in this paper than those  
300 used by Kumar (2017). The effect of the EPBs decreases with the latitudes in the equinoctial  
301 months, and at the latitude higher than ~26 °N, the MOR in the equinoctial months is low.

302 Lee et al. (2009) investigated the occurrence probabilities of irregularity in solar maximum of  
303 2000 at Chungli (24.9 °N, 121.2 °E) and (14.0-14.6 °N, 121.0-121.1 °E) in Manila. They found that  
304 the seasonal variations at the crest and the dip equator had similar trends. They also showed the  
305 range spread F (RSF) had similar occurrence probability to that of GPS phase fluctuations while  
306 the frequency spread F (FSF) peaked in June as the spread F at mid latitude. The seasonal  
307 variation in this paper for the two lower latitude belts in 2014 is consistent to their observations in  
308 2002. The high MOR in June is similar to the FSF. Using the observation in Japan in 2000, Otsuka  
309 et al. (2006) showed similar results that the occurrence rate peaks at equinoxes in 25 °N, but peaks  
310 at summer in 29 °N. The peaks in 25 °N is because of the latitudes of Japan.

311 In both solar medium 2003 and minimum 2008, the MOR just shows maximum values in  
312 May/June. MOR in the higher three latitude belts of 26-29 °N, 29-32 °N and 32-35 °N are larger  
313 than those in the two lower ones. This implies that the irregularity is encountered more frequently  
314 at higher latitude. Kumar (2017) also reported maximum MOR in June observed with GPS  
315 receivers in latitudes 13-17 °N over India for 2007-2009. However, Buhari et al. (2017) found that  
316 the MOR of EPBs over Malaysia (near magnetic equator, 1~7 °N in geolatitude) was still active  
317 during equinoctial months in low solar activity years. In this paper, the irregularities in 2008 did

318 not show high occurrence in the equinoctial months for all the latitudes. Maybe the EPBs near the  
319 magnetic equator in the low solar activity years are weak and cannot reach the latitude of 20°N.

320 LOR is a parameter to represent the spatiotemporal range of the irregularities. It is used to  
321 describe another characteristic of the irregularities in this study. In 2014 and 2003, LOR peaks in  
322 March and September/October for the latitude belts of 20~23°N and 23~26°N. This means the  
323 irregularities in the two latitude belts has larger spatiotemporal range than those in other months.  
324 While for the latitude belts of 26~29°N, 29~32°N and 32~35°N, LOR in May/June are larger than  
325 those in spring and autumn. Compared the seasonal variation of MOR with LOR, it can be seen  
326 the spatiotemporal range of the irregularities in summer is small although the monthly occurrence  
327 is high in these months.

328 Nonequatorial processes were also suggested by Sripathi (2018) for equatorial and low  
329 latitude irregularities, which showed that the postmidnight spread F during summer was weaker in  
330 strength and shorter in duration than equatorial spread F mostly occurred in equinoxes and winter.  
331 Further the postmidnight spread F during summer is found to be stronger and earlier at low  
332 latitudes followed by their occurrence at the equator (Sripathi et al., 2018). The EPBs-induced  
333 irregularities can reach different latitudes from the dip equator in different events; therefore, the  
334 occurrence of these irregularities must decrease with latitudes in statistics. Otherwise, the  
335 irregularities are not from the EPBs, which are referred as non-equatorial process. MORs and  
336 LORs decrease with the latitudes in spring and autumn of 2014 and 2003, February and October  
337 of 2008. This means the irregularities in these months are mainly from the EPBs. But in summer,  
338 MOR and LOR did not decrease with the latitudes. They are smaller in 20~23°N and 23~26°N  
339 than those in three higher latitude belts. The irregularities may be mainly affected by the  
340 nonequatorial process. The nonequatorial process did not affect the lower latitude irregularities in  
341 20~23°N and 23~26°N obviously.

342 Figure 5 shows the variation of the ROTI maximum. In the solar minimum of 2008, the  
343 ROTI maximum is quite weak for the whole year compared with that in 2014. Higher solar  
344 activity implies greater pre-reversal eastward electric field, earlier occurrence and earlier decay of  
345 EPBs under magnetically quiet conditions (Fejer et al., 1999; Hysell et al., 2002). In solar medium  
346 and maximum the irregularity associated with plasma bubble can be very strong not only in March,  
347 but also in Feb and April. The ROTI maximum in May to August in 2003 is the smallest in latitude

348 belt 26-29 °N, implying that the irregularity originated in nonequatorial processes is much weaker  
349 than plasma bubble. The small ROTI maximum and LOR in 29-32 °N and 32-35 °N in these  
350 months confirm this suggestion again. It is known that Perkins instability is responsible for the  
351 mid latitude irregularities (Perkins, 1973; Yokoyama et al., 2009). Otsuka et al. (2006) observed  
352 that the frequent occurrence of the irregularity in mid latitude in the summer night was usually  
353 accompanied by medium-scale traveling ionospheric disturbances (MSTID). Meridional  
354 observations from mid latitude to magnetic equator are needed to confirm and clarify the  
355 nonequatorial origin of the irregularities observed near equatorial anomaly crest. Because of the  
356 limitation of the IGS station, no observations near the magnetic equator are obtained along the  
357 longitude of 121°E. Further study will be explored for other meridional observations.

358 The scatter plot of ROTI maximum versus F10.7 is rather dispersed, as shown in Fig. 6.  
359 However, confined in a funnel, a large ROTI maximum has a tendency to be related with a large  
360 F10.7. But the reverse is not always true. Higher solar activity only is a necessary condition for the  
361 production of stronger plasma bubble related irregularities.

## 362 **5. Conclusion**

363 Using the GPS observations at TWTF (24.95 °N, 121.16 °E, dip latitude: 18.20 °N) and SHAO  
364 (31.10 °N, 121.20 °E, dip latitude: 23.30 °N), characteristics of the ionospheric irregularities near  
365 the EIA crest are studied for the solar minimum of 2008, medium of 2003 and the solar maximum  
366 of 2014. The irregularity events were detected with ROTI. Most of the irregularity events were  
367 first observed after sunset and before midnight. The maximum occurrence time is between  
368 19:00~20:00 LT in 2014. Local occurrence rate (LOR) is proposed to describe the spatiotemporal  
369 range of the irregularities. The monthly occurrence rate (MOR), LOR and ROTI maximum are  
370 analyzed in five latitude belts of 20-23 °N, 23-26 °N, 26-29 °N, 29-32 °N and 32-35 °N.

371 In 2003 and 2014, MORs peaked in February/March, May/June and September/October for  
372 the latitude 20~23 °N and 23~26 °N. For the latitude 26~29 °N, no MOR peak appeared in autumn  
373 of 2014, and in 2003 MOR only peaked in June. The MORs of the irregularities observed in  
374 20-23 °N, 23-26 °N were similar to the occurrence of the EPBs in 2003 and 2014. As for LOR in  
375 20-23 °N and 23-26 °N, obvious equinox peaks appeared in 2003 and 2014, and no LOR peak was

376 observed in June. For the higher three latitude belts, the LOR maximum appeared in June of 2003  
377 and 2014. MORs and LORs decreased with latitudes in the March and September/October of the  
378 two years. This indicated the irregularities were mainly from the EPBs. In June of 2003 and 2014  
379 MORs and LORs for the higher three latitude belts are larger than the low two ones, which imply  
380 the nonequatorial process played an important role on the irregularities. In 2008, LOR peaks only  
381 appeared in February (20-23°N and 23-26°N) and October (20-23°N). MORs and LORs in this  
382 year were smaller than those in 2003 and 2014. The seasonal variation of ROTI maximum  
383 confirmed that the irregularities with large TEC fluctuation appeared in the equinoctial months for  
384 the lower latitudes. In the higher latitudes, they had small TEC fluctuation. Higher solar activity is  
385 a necessary but not sufficient condition for the production of stronger electron density  
386 irregularities.

### 387 **Acknowledgement**

388 This research has been carried out under the support of the National Natural Science Foundation  
389 of China (NSFC No. 11873064) and National key Research Program of China "Collaborative  
390 Precision Positioning Project" (No.2016YFB0501900). IGS is acknowledged for free use of GPS  
391 data. GM wishes to thank T. Maruyama for helpful discussion.

### 392 **References**

- 393 Aarons, J.: Global morphology of ionospheric scintillations, *Proceedings of the IEEE*, 70, 360-378,  
394 1975.
- 395 Aarons, J., Mendillo, M., and Yantosca, R.: GPS phase fluctuations in the equatorial region during  
396 the MISETA 1994 campaign, *Journal of Geophysical Research: Space Physics*, 101,  
397 26851-26862, 1996.
- 398 Abdu, M.A., Alam Kherani, E., Batista, I.S., de Paula, E.R., Fritts, D.C. and Sobral, J.H.A.:  
399 Gravity wave initiation of equatorial spread F/plasma bubble irregularities based on  
400 observational data from the SpreadFEx campaign, *Annales Geophysicae*, 27, 2607-2622,  
401 doi:10.5194/angeo-27-2607-2009, 2009.
- 402 Afraimovich, E.L. and Yasukevich, Yu.V.: Using GPSGLONASSGALILEO data and IRI  
403 modeling for ionospheric calibration of radio telescopes and radio interferometers, *Journal of*

404 Atmospheric and Solar-Terrestrial Physics, 70, 1949-1962, 2008

405 Balan, N., Liu, L. B., and Le, H. J.: A brief review of equatorial ionization anomaly and  
406 ionospheric irregularities, *Earth and Planetary Physics*, 2, 257–275, 2018.

407 Basu, S. and Basu, S.: Equatorial scintillations—a review, *Journal of Atmospheric and Terrestrial*  
408 *Physics*, 43, 473-489, 1981.

409 Basu, S., Groves, K.M., Quinn, J.M., and Doherty, P.: A comparison of TEC fluctuations and  
410 scintillations at Ascension Island, *Journal of Atmospheric and Solar-Terrestrial Physics*, 61,  
411 1219-1226, 1999.

412 Booker, H. G., and Wells, H. W.: Scattering of radio waves by the f-region of the ionosphere,  
413 *Journal of Geophysical Research*, 43, 249-256, 1938.

414 Buhari, S. M., Abdullah, M., Yokoyama, T., Otsuka, Y., Nishioka, M., Hasbi, A. M., Bahari, S. A.,  
415 and Tsugawa, T., Climatology of successive equatorial plasma bubbles observed by GPS  
416 ROTI over Malaysia, *Journal of Geophysical Research: Space Physics*, 122,  
417 doi:10.1002/2016JA023202, 2017

418 Erickson, W. C., Perley, R. A., Flatters, C., and Kassim, N. E.: Ionospheric corrections for VLA  
419 observations using local GPS data, *Astronomy and Astrophysics*, 366, 1071–1080,  
420 doi:10.1051/0004-6361:20000359, 2001.

421 Fejer, B. G.; Scherliess, L.; Paula, E. R. D. Effects of the vertical plasma drift velocity on the  
422 generation and evolution of equatorial spread F, *J. Geophys. Res.*, 104(A9):19859-19869,  
423 1999.

424 Hysell, D. L.; Burcham, J. D. Long term studies of equatorial spread F using the JULIA radar at  
425 Jicamarca, *J. Atmospheric and Solar-Terrestrial Phys.*, 64(12-14):1531-1543. 12, 2002.

426 Kelley, M. C., and McClure, J. P.: Equatorial spread-F: A review of recent experimental results,  
427 *Journal of Atmospheric and Terrestrial Physics*, 43, 5, 427-435, 1981.

428 Kumar, S.: Morphology of equatorial plasma bubbles during low and high solar activity years over  
429 Indian sector, *Astrophysics and Space Science*, 362, 5, 93, 2017.

430 Lee, C. C., Chu, F. D., Chen, W. S., Liu, J. Y., Su, S.-Y., Liou Y. A., and Yu, S. B.: Spread F, GPS  
431 phase fluctuations, and plasma bubbles near the crest of equatorial ionization anomaly during  
432 solar maximum, *Journal of Geophysical Research: Space Physics*, 114, A08302,  
433 doi:10.1029/2009JA014195, 2009.



434 Lee, J., Amt, T. T., Jung, S., and Pullen, S.: Enhancements of Long Term Ionospheric Anomaly  
435 Monitoring for the Ground-Based Augmentation System, Proceedings of the 2011  
436 International Technical Meeting of The Institute of Navigation, 930 San Diego, CA, January  
437 24-26, 930-941, 2011.

438 Maruyama, T.: Ionospheric irregularities, Journal of the National Institute of Information and  
439 Communications Technology, 49, 163-179, 2002.

440 McClure, J. P., Hanson, W. B., and Hoffman, J. H.: Plasma bubbles and irregularities in the  
441 equatorial ionosphere, Journal of Geophysical Research: Space Physics, 82, 2650-2656,  
442 1977.

443 Mendillo, M., and Baumgardner, J.: Airglow characteristics of equatorial plasma depletions,  
444 Journal of Geophysical Research: Space Physics, 87, 7641-7652, 1982.

445 Mendillo, M., Lin, B., and Aarons, J.: The application of gps observations to equatorial aeronomy,  
446 Radio Science, 35, 3, 885-904, 2000.

447 Mungufeni, P., Habarulema J. B., Jurua E.: Modeling of ionospheric irregularities during  
448 geomagnetically disturbed conditions over African low-latitude region, Space Weather, 14,  
449 doi:10.1002/2016SW001446, 2016

450 Mungufeni, P., Habarulema J. B., Jurua E.: Trends of ionospheric irregularities over African low  
451 latitude region during quiet geomagnetic conditions, Journal of Atmospheric and  
452 Solar-Terrestrial Physics, 138-139, 261-267, 2016

453 Nishioka, M., Saito, A., and Tsugawa, T.: Occurrence characteristics of plasma bubble derived  
454 from global groundbased GPS receiver networks, Journal of Geophysical Research: Space  
455 Physics, 113, A05301, doi:10.1029/2007JA012605, 2008.

456 Ossakow, S. L.: Spread-F theories—A review, Journal of Atmospheric and Solar-Terrestrial Physics,  
457 43, 437-443, 1981.

458 Otsuka, Y., Aramaki, T., Ogawa, T., and Saito, A.: A statistical study of ionospheric irregularities  
459 observed with a GPS network in Japan, Corotating Solar Wind Streams and recurrent  
460 Geomagnetic Activity, Geophysical Monograph Series, AGU, Washington, D. C., 2006.

461 Perkins, F.: Spread F and ionospheric currents, Journal of Geophysical Research: Space Physics,  
462 78, 218–226, 1973.

463 Pi X., Mannucci, A. J., Lindqwister, U. J., and Ho, C. M.: Monitoring of global ionospheric

464 irregularities using the worldwide GPS network, *Geophysical Research Letters*, 24,  
465 2283-2486, 1997.

466 Sripathi, S., Sreekumar, S. and Banola, S.: Characteristics of Equatorial and Low-Latitude Plasma  
467 Irregularities as Investigated Using a Meridional Chain of Radio Experiments Over India,  
468 *Journal of Geophysical Research: Space Physics*, 123, 9, DOI: 10.1029/2017JA024980,  
469 2018.

470 Weber, E. J., Buchau, J., Eather, R. H., and Mende, S. B.: North-south aligned equatorial airglow  
471 depletions, *Journal of Geophysical Research: Space Physics*, 83(A2), 712-716, 1978.

472 Woodman, R. F. and La Hoz, C.: Radar observations of F region equatorial irregularities, *Journal*  
473 *of Geophysical Research: Space Physics*, 81, 5447-5466, 1976.

474 Yokoyama, T., Hysell, D. L., Otsuka, Y., and Yamamoto, M.: Three-dimensional simulation of the  
475 coupled Perkins and Es-layer instabilities in the nighttime midlatitude ionosphere, *Journal of*  
476 *Geophysical Research: Space Physics*, 114, A03308, doi:10.1029/2008JA013789, 2009.

477 Zaboltn, N. A., and Wright, J. W.: Phase structure functions for ionospheric radio sounding:  
478 Dependence on irregularity scale, *Radio Science*, 39, RS2003, doi:10.1029/2003RS002882,  
479 2004.

480 Zheng, H., Li, L. and Li, F.: Study about Ionospheric Effects on Spaceborne SAR Azimuth  
481 Imaging, *Journal of electronics & information technology (in Chinese)*, 30: 2085-2088, 2008
